# Supplementary material for: Prediction of an arc-tunable Weyl Fermion metallic state in MoxW1−xTe2
Source: PubMed Central journal article supplement (PMC4756349; doi:10.1038/ncomms10639), 2016-02-15
Supplement: ncomms10639-s1.pdf [file ncomms10639-s1.pdf]

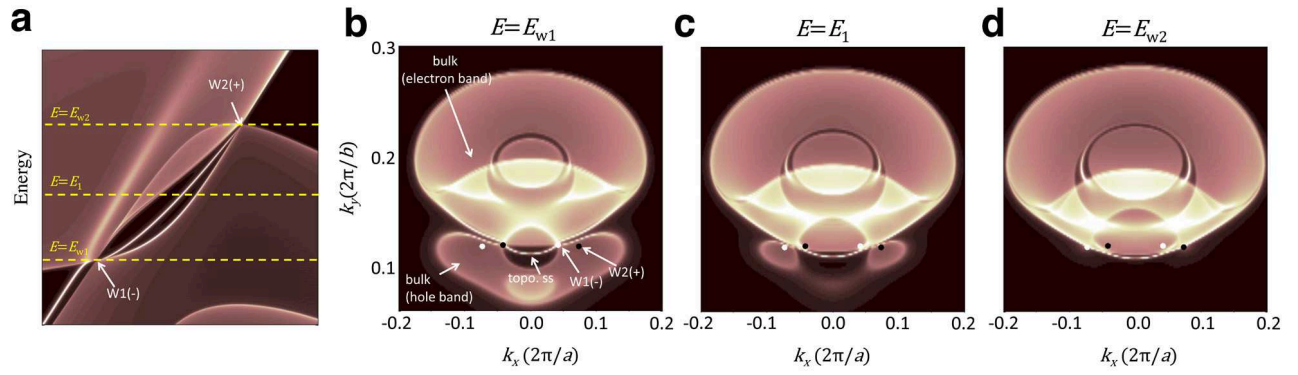

**Supplementary Figure 1: Constant energy contours at different binding energies.** **a**, Band structure along a  $k$  space cut that goes through the direct pair of Weyl nodes,  $W1(-)$  and  $W2(+)$ . **b**, Constant energy contours at the energy  $E_{w1}$ . **c**, Constant energy contours at the energy  $E_1$ . **d**, Constant energy contours at the energy  $E_{w2}$ .

**Supplementary Note 1:** Constant energy contours at different binding energies

Here we show constant energy contours of  $\text{Mo}_{0.2}\text{W}_{0.8}\text{Te}_2$  at different binding energies (Supplementary Fig. 1). We only show very high resolution calculations at  $k$  points around the  $\Gamma$  point because there are no states near the surface Brillouin zone boundaries. The constant energy contour at the energy  $E_1$  is the same as Fig. 4d in the main text.
